# Supplementary material for: Charge controlled changes in the cluster and spin dynamics of Sc3N@C80(CF3)2: the flexible spin density distribution and its impact on ESR spectra
Source: Royal Society of Chemistry journal article supplement (doi:10.1039/c0cp02070b), 2011-01-01
Supplement: c0cp02070b.pdf [file c0cp02070b.pdf]

## Charge controlled changes in the cluster and spin dynamics of $\text{Sc}_3\text{N@C}_{80}(\text{CF}_3)_2$ : the flexible spin density distribution and its impact on ESR spectra

Alexey A. Popov and Lothar Dunsch

### Supporting information

|                                                                                                                                                           |    |
|-----------------------------------------------------------------------------------------------------------------------------------------------------------|----|
| Table S1. PEB/TZ2P relative energies of conformers of non-charged $\text{Sc}_3\text{N@C}_{80}(\text{CF}_3)_2$                                             | 2  |
| Cartesian coordinates of lowest-energy conformers                                                                                                         | 3  |
| Table S2. PEB/TZ2P relative energies of conformers of $\text{Sc}_3\text{N@C}_{80}(\text{CF}_3)_2^+$                                                       | 7  |
| Cartesian coordinates of lowest-energy conformers                                                                                                         | 8  |
| Table S3. PEB/TZ2P relative energies of conformers of $\text{Sc}_3\text{N@C}_{80}(\text{CF}_3)_2^-$                                                       | 16 |
| Cartesian coordinates of lowest-energy conformers                                                                                                         | 17 |
| Table S4. PEB/TZ2P relative energies of conformers of $\text{Sc}_3\text{N@C}_{80}(\text{CF}_3)_2^{3-}$                                                    | 21 |
| Cartesian coordinates of lowest-energy conformers                                                                                                         | 22 |
| Figure S1. Spin populations in $\text{Sc}_3\text{N@C}_{80}(\text{CF}_3)_2^+$ as a functions of time.                                                      | 28 |
| Figure S2. Time-averaged $a(^{45}\text{Sc})$ values in $\text{Sc}_3\text{N@C}_{80}^-$ as a function of propagation time in three independent trajectories | 29 |
| Figure S3. Instant $a(^{45}\text{Sc})$ values in $\text{Sc}_3\text{N@C}_{80}^-$ as a function of time in BOMD trajectory                                  | 30 |
| Figure S4. Spin population for Sc1-Sc3 atoms along the reaction coordinate                                                                                | 31 |

To study as much configurations of the  $\text{Sc}_3\text{N}$  cluster inside  $\text{Sc}_3\text{N}@C_{80}(\text{CF}_3)_2$  as possible, we have degenerated multiple conformations by (a) considering  $C_s$  and  $C_3$  conformers of parent  $\text{Sc}_3\text{N}@C_{80}$  (see ref. 16) and then (b) by adding a pair of  $\text{CF}_3$  groups in all possible symmetry-non-equivalent positions of these two conformers. This way, more than 50 initial structures were generated, which were then fully optimized in different charged states without symmetry restrictions. The procedure resulted in 30-40 different conformers for each charged state listed below.

**Table S1. PEB/TZ2P relative energies of conformers of non-charged  $\text{Sc}_3\text{N}@C_{80}(\text{CF}_3)_2$**

| conformer | $\Delta E$ , kJ/mol |
|-----------|---------------------|
| Cnf1      | 0.0                 |
| Cnf2      | 1.7                 |
| Cnf3      | 13.0                |
| Cnf4      | 15.5                |
| Cnf5      | 16.4                |
| Cnf6      | 21.1                |
| Cnf7      | 21.4                |
| Cnf8      | 25.4                |
| Cnf9      | 25.9                |
| Cnf10     | 27.4                |
| Cnf11     | 35.2                |
| Cnf12     | 38.4                |
| Cnf13     | 40.9                |
| Cnf14     | 43.6                |
| Cnf15     | 45.6                |
| Cnf16     | 46.4                |
| Cnf17     | 46.6                |
| Cnf18     | 46.8                |
| Cnf19     | 47.6                |
| Cnf20     | 47.7                |
| Cnf21     | 48.7                |
| Cnf22     | 48.8                |
| Cnf23     | 49.2                |
| Cnf24     | 51.1                |
| Cnf25     | 51.8                |
| Cnf26     | 53.0                |
| Cnf27     | 55.8                |
| Cnf28     | 56.5                |
| Cnf29     | 58.7                |
| Cnf30     | 61.2                |
| Cnf31     | 62.0                |
| Cnf32     | 62.4                |
| Cnf33     | 64.9                |

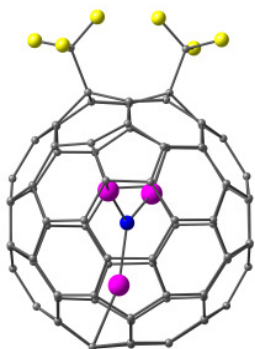

**Cnf1**



**Cnf2**



**Cnf3**



**Cnf4**



**Cnf13**



**Cnf33**

**PBE/TZ2P Cartesian coordinates of Sc<sub>3</sub>N@C<sub>80</sub>(CF<sub>3</sub>)<sub>2</sub>, Cnf1, ΔE=0.0 kJ/mol**

|   |              |              |              |
|---|--------------|--------------|--------------|
| C | -3.715026510 | -1.597919280 | 0.710893390  |
| C | -3.683751480 | -1.587792280 | -0.723330870 |
| C | -3.909015650 | -0.236902710 | -1.180884220 |
| C | -4.051608560 | 0.594081870  | -0.008136200 |
| C | -3.932888320 | -0.249652370 | 1.158929420  |
| C | -3.335305560 | 0.253573490  | 2.348452290  |
| C | -2.555634590 | -0.661675400 | 3.144989600  |
| C | -2.310457210 | -1.993177560 | 2.663525060  |
| C | -2.870248440 | -2.489584610 | 1.437924680  |
| C | -2.113822960 | -3.457788280 | 0.725063810  |
| C | -2.101852560 | -3.456760660 | -0.717434940 |
| C | -2.838989100 | -2.480444730 | -1.445574220 |
| C | -2.281237770 | -1.974597210 | -2.662101370 |
| C | -2.530593880 | -0.645809540 | -3.115120080 |
| C | -3.365906560 | 0.263168950  | -2.419066850 |
| C | -3.035151270 | 1.688716010  | -2.474642230 |
| C | -3.143800670 | 2.509152950  | -1.256672780 |
| C | -3.622340580 | 1.961382610  | -0.004896690 |
| C | -3.079360060 | 2.467880340  | 1.221747480  |
| C | -2.949039170 | 1.621407090  | 2.377441290  |
| C | -1.778844820 | 2.040449060  | 3.114513000  |
| C | -0.997814500 | 1.124810680  | 3.895141710  |
| C | -1.448895470 | -0.256700650 | 3.992571980  |
| C | -0.483841040 | -1.369829510 | 3.999953910  |
| C | -1.032652670 | -2.418363300 | 3.154314100  |
| C | -0.235794870 | -3.335070990 | 2.372870510  |
| C | -0.811237450 | -3.870313320 | 1.183837440  |
| C | 0.008366300  | -4.114895670 | 0.022293060  |
| C | -0.790972900 | -3.851830530 | -1.149711860 |
| C | -0.217291180 | -3.285091430 | -2.321321340 |
| C | -0.994062940 | -2.402474970 | -3.128817470 |
| C | -0.396725960 | -1.342594180 | -3.884135990 |
| C | -1.465662340 | -0.263173390 | -4.156369550 |
| C | -0.917206360 | 1.119000410  | -3.826513700 |
| C | -1.761556750 | 2.027718570  | -3.090060690 |
| C | -1.156136670 | 3.086892370  | -2.325841210 |
| C | -1.984292540 | 3.370762580  | -1.190744660 |
| C | -1.397854590 | 3.860423800  | 0.035261880  |
| C | -1.996792260 | 3.422605750  | 1.251504690  |
| C | -1.193964530 | 3.159562080  | 2.411913620  |
| C | 1.188194280  | -3.049907100 | -2.310861090 |
| C | 1.801262330  | -1.986896730 | -3.059567220 |
| C | 0.971465620  | -1.082906670 | -3.814560530 |
| C | 1.525959090  | 0.299482620  | -4.130180450 |
| C | 0.453139080  | 1.378016470  | -3.870791920 |
| C | 1.040360880  | 2.436612380  | -3.107465500 |
| C | 0.251325380  | 3.317135220  | -2.308723380 |

|    |              |              |              |
|----|--------------|--------------|--------------|
| C  | 0.810198500  | 3.881265050  | -1.129478550 |
| C  | -0.004586550 | 4.143505970  | 0.032683890  |
| C  | 0.801302520  | 3.900426380  | 1.203718350  |
| C  | 0.219255670  | 3.356650010  | 2.387424540  |
| C  | 1.013077540  | 2.456390980  | 3.167714650  |
| C  | 0.418467550  | 1.359935130  | 3.897142530  |
| C  | 1.371550970  | 0.262304730  | 3.902310980  |
| C  | 0.943315380  | -1.111550960 | 3.906003530  |
| C  | 1.739234960  | -2.021572370 | 3.134777080  |
| C  | 1.174520990  | -3.151553680 | 2.422042810  |
| C  | 1.990945900  | -3.405405010 | 1.273095830  |
| C  | 1.402711130  | -3.832701560 | 0.047532580  |
| C  | 2.001418390  | -3.337449410 | -1.166656510 |
| C  | 3.160390090  | -2.472863670 | -1.211188820 |
| C  | 3.065421180  | -1.649089250 | -2.423841050 |
| C  | 3.403342920  | -0.226595580 | -2.367564060 |
| C  | 2.576748930  | 0.680460960  | -3.073845900 |
| C  | 2.322630250  | 2.010720660  | -2.623952090 |
| C  | 2.863081040  | 2.512622560  | -1.400396960 |
| C  | 2.113292230  | 3.482261570  | -0.676679750 |
| C  | 2.107488810  | 3.484563650  | 0.764946850  |
| C  | 2.862815080  | 2.523584680  | 1.499759500  |
| C  | 2.317472350  | 2.048806390  | 2.734139000  |
| C  | 2.540112940  | 0.697977660  | 3.177444660  |
| C  | 3.312450710  | -0.219209390 | 2.402668490  |
| C  | 2.913159460  | -1.589922440 | 2.418447810  |
| C  | 3.062753170  | -2.434094900 | 1.263525120  |
| C  | 3.626556360  | -1.929688150 | 0.046638780  |
| C  | 4.063040130  | -0.563772200 | 0.051492740  |
| C  | 3.933621240  | 0.269740300  | -1.122652900 |
| C  | 3.694763220  | 1.617853510  | -0.664681020 |
| C  | 3.704055900  | 1.624558320  | 0.769765490  |
| C  | 3.925645490  | 0.277202400  | 1.216181360  |
| Sc | -1.592023520 | 0.816836160  | -0.977363400 |
| Sc | 1.619709340  | -0.763579790 | -0.924757550 |
| Sc | -0.296579480 | -0.237655090 | 2.025758710  |
| N  | -0.048893080 | -0.068338250 | 0.030845220  |
| C  | -2.112029010 | -0.335369530 | -5.571583240 |
| F  | -1.258240250 | 0.016339160  | -6.556944880 |
| F  | -2.567912970 | -1.586472370 | -5.841775210 |
| F  | -3.177548120 | 0.512829320  | -5.635319070 |
| C  | 2.190907790  | 0.376053370  | -5.536757100 |
| F  | 2.645153930  | 1.629017560  | -5.799634200 |
| F  | 3.259996490  | -0.468178200 | -5.587899100 |
| F  | 1.350724560  | 0.022083650  | -6.533391590 |

**PBE/TZ2P Cartesian coordinates of  $\text{Sc}_3\text{N}@C_{80}(\text{CF}_3)_2$ , Cnf2,  $\Delta E=1.7$  kJ/mol**

|   |              |              |              |
|---|--------------|--------------|--------------|
| C | 1.144155680  | -0.833089760 | 3.834684890  |
| C | 0.958512440  | -2.149950160 | 3.290574810  |
| C | 2.084068590  | -2.489874790 | 2.489339160  |
| C | 3.200207620  | -1.455456080 | 2.718821390  |
| C | 2.400586170  | -0.315001910 | 3.383983900  |
| C | 2.544938590  | 1.029986950  | 3.049403550  |
| C | 1.440192750  | 1.914756930  | 3.284566240  |
| C | 0.195893920  | 1.388879440  | 3.770632680  |
| C | 0.011557080  | 0.004433500  | 4.041058120  |
| C | -1.297345930 | -0.531174110 | 3.856178130  |
| C | -1.473472320 | -1.865579900 | 3.359377130  |
| C | -0.347308050 | -2.675242800 | 3.032164390  |
| C | -0.462568430 | -3.565143340 | 1.929105910  |
| C | 0.677986450  | -3.876900900 | 1.103950460  |
| C | 1.995821350  | -3.369376830 | 1.382133030  |
| C | 2.884223060  | -3.150763140 | 0.243682710  |
| C | 3.644404370  | -1.910533980 | 0.251701620  |
| C | 3.750143940  | -1.002684790 | 1.371591000  |
| C | 3.989310060  | 0.346849330  | 1.109224150  |
| C | 3.620784050  | 1.491702790  | 2.076793840  |
| C | 3.024520450  | 2.522230200  | 1.098146950  |
| C | 1.982006770  | 3.439998980  | 1.386874560  |
| C | 1.174767490  | 3.157942750  | 2.578389330  |
| C | -0.281545720 | 3.315065300  | 2.549610120  |
| C | -0.866848620 | 2.225443330  | 3.304135470  |
| C | -2.158659960 | 1.660565550  | 3.026982600  |
| C | -2.362642100 | 0.286595720  | 3.340277480  |
| C | -3.200523580 | -0.543527270 | 2.505972880  |
| C | -2.643116150 | -1.876860130 | 2.520813420  |
| C | -2.724861880 | -2.705373120 | 1.366366380  |
| C | -1.643382190 | -3.601692950 | 1.107664530  |
| C | -1.233665740 | -3.912227670 | -0.237044400 |
| C | 0.196224440  | -4.082916540 | -0.240870240 |
| C | 0.999596050  | -3.744314430 | -1.381162750 |
| C | 2.355537530  | -3.311652910 | -1.126174260 |
| C | 2.853699030  | -2.219333130 | -1.929655590 |
| C | 3.654994520  | -1.377541420 | -1.086967570 |
| C | 3.825278510  | 0.013096830  | -1.360528700 |
| C | 4.009730440  | 0.863366330  | -0.226834370 |
| C | 3.414245370  | 2.167574400  | -0.229583850 |
| C | 2.725134320  | 2.670279020  | -1.375238190 |
| C | 1.644632070  | 3.565814930  | -1.113468590 |
| C | 1.266406260  | 3.946734410  | 0.232120520  |
| C | -0.175901140 | 4.118424350  | 0.221713630  |
| C | -0.975253020 | 3.756719310  | 1.359022560  |
| C | -2.278487000 | 3.214401080  | 1.090814740  |
| C | -2.874761830 | 2.203680410  | 1.926547520  |

|    |              |              |              |
|----|--------------|--------------|--------------|
| C  | -3.710059800 | 1.369150570  | 1.097640290  |
| C  | -3.906732700 | -0.025681770 | 1.368509900  |
| C  | -4.152215840 | -0.909920250 | 0.234507250  |
| C  | -3.488472620 | -2.207067860 | 0.240773690  |
| C  | -3.026553580 | -2.495083580 | -1.097872300 |
| C  | -1.888676860 | -3.339563780 | -1.363476380 |
| C  | -1.118615140 | -3.053507230 | -2.523482770 |
| C  | 0.311886440  | -3.241040800 | -2.528953770 |
| C  | 0.887141100  | -2.227986250 | -3.381992440 |
| C  | 2.156868210  | -1.666509420 | -3.068854510 |
| C  | 2.379762070  | -0.295726720 | -3.375664600 |
| C  | 3.206216980  | 0.530561020  | -2.530033290 |
| C  | 2.660227860  | 1.859619980  | -2.540472180 |
| C  | 1.489732110  | 1.856576840  | -3.381025330 |
| C  | 0.366681940  | 2.678829500  | -3.070778860 |
| C  | 0.480857330  | 3.569560190  | -1.951421890 |
| C  | -0.647242400 | 3.884655500  | -1.125829020 |
| C  | -1.931313220 | 3.317664200  | -1.386155810 |
| C  | -2.751624370 | 3.019582770  | -0.255445750 |
| C  | -3.626416020 | 1.877797350  | -0.256294340 |
| C  | -3.736073440 | 1.008905220  | -1.390305430 |
| C  | -4.046930730 | -0.386984600 | -1.140151480 |
| C  | -3.349118520 | -1.377290570 | -1.939980540 |
| C  | -2.501393640 | -1.045788240 | -3.065409540 |
| C  | -1.418575620 | -1.921677210 | -3.362065960 |
| C  | -0.179669490 | -1.412275480 | -3.894248780 |
| C  | 0.010051520  | -0.013374210 | -4.114610600 |
| C  | 1.316899950  | 0.525741580  | -3.899756120 |
| C  | -0.933482010 | 2.177929750  | -3.376331200 |
| C  | -2.060527600 | 2.485294370  | -2.535789070 |
| C  | -2.937252150 | 1.343436440  | -2.530913850 |
| C  | -2.346744760 | 0.332883210  | -3.380060270 |
| C  | -1.111683510 | 0.849731450  | -3.900777320 |
| N  | -0.044442090 | -0.061661600 | 0.220453240  |
| Sc | 0.438302490  | 1.785670200  | 0.925599070  |
| Sc | 1.273779070  | -1.597863070 | -0.007535240 |
| Sc | -2.000947660 | -0.348100930 | -0.099888250 |
| C  | 4.837252520  | 2.145550150  | 2.796003270  |
| F  | 4.431900990  | 3.258440310  | 3.470011340  |
| F  | 5.786958830  | 2.531346790  | 1.903496950  |
| F  | 5.421786560  | 1.320997940  | 3.691451980  |
| C  | 4.286343680  | -2.101202820 | 3.628756070  |
| F  | 3.767871970  | -2.469022690 | 4.829480630  |
| F  | 5.332049300  | -1.279088890 | 3.863645400  |
| F  | 4.781178230  | -3.224083300 | 3.033456370  |

**Table S2. Relative energies of the conformers of  $\text{Sc}_3\text{N}@C_{80}(\text{CF}_3)_2^+$**

| conformer | $\Delta E$ , kJ/mol |
|-----------|---------------------|
| Cnf1      | 0.0                 |
| Cnf2      | 3.8                 |
| Cnf3      | 4.4                 |
| Cnf4      | 7.4                 |
| Cnf5      | 8.1                 |
| Cnf6      | 8.5                 |
| Cnf7      | 9.0                 |
| Cnf8      | 9.6                 |
| Cnf9      | 9.8                 |
| Cnf10     | 10.0                |
| Cnf11     | 11.7                |
| Cnf12     | 13.7                |
| Cnf13     | 13.9                |
| Cnf14     | 14.8                |
| Cnf15     | 15.2                |
| Cnf16     | 15.5                |
| Cnf17     | 16.0                |
| Cnf18     | 16.0                |
| Cnf19     | 17.1                |
| Cnf20     | 17.7                |
| Cnf21     | 18.1                |
| Cnf22     | 18.2                |
| Cnf23     | 18.4                |
| Cnf24     | 19.8                |
| Cnf25     | 20.8                |
| Cnf26     | 21.2                |
| Cnf27     | 21.7                |
| Cnf28     | 24.1                |
| Cnf29     | 24.2                |
| Cnf30     | 26.6                |
| Cnf31     | 31.2                |
| Cnf32     | 37.3                |
| Cnf33     | 38.5                |
| Cnf34     | 39.6                |
| Cnf35     | 43.1                |
| Cnf36     | 48.9                |

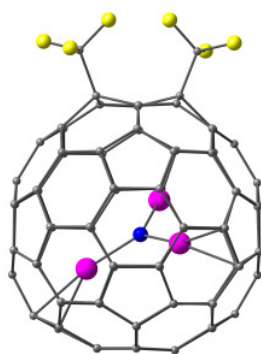

**Cnf1**

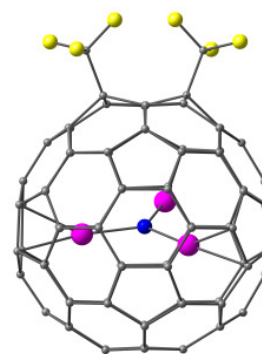

**Cnf2**

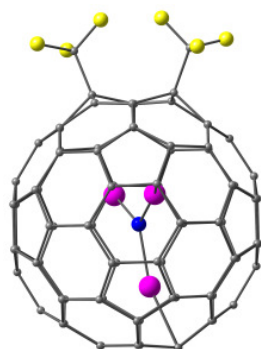

**Cnf3**

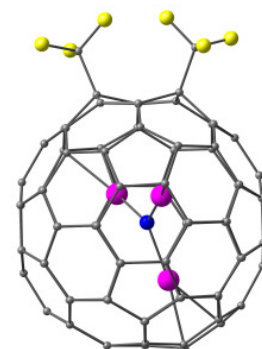

**Cnf4**

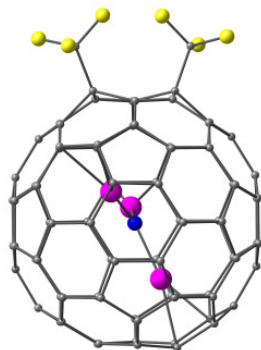

**Cnf5**

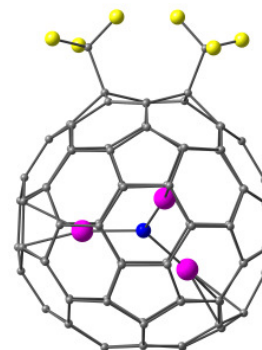

**Cnf6**

**PBE/TZ2P Cartesian coordinates of  $\text{Sc}_3\text{N}@C_{80}(\text{CF}_3)_2^+$ , Cnf1,  $\Delta E = 0.0$  kJ/mol**

|   |              |              |              |
|---|--------------|--------------|--------------|
| C | -3.706014240 | -1.589446020 | 0.761754940  |
| C | -3.707039900 | -1.575061070 | -0.680570250 |
| C | -3.917030420 | -0.221781380 | -1.106764770 |
| C | -4.049304270 | 0.606288700  | 0.055104440  |
| C | -3.935837580 | -0.233349960 | 1.227759960  |
| C | -3.398176200 | 0.249269660  | 2.472284180  |
| C | -2.664755220 | -0.708079690 | 3.296526010  |
| C | -2.410667070 | -2.069772310 | 2.788359670  |
| C | -2.908417590 | -2.514328550 | 1.503125350  |
| C | -2.128994610 | -3.455618650 | 0.746907080  |
| C | -2.139482030 | -3.445865000 | -0.692126480 |
| C | -2.881894830 | -2.478385430 | -1.415377210 |
| C | -2.324950140 | -2.009307420 | -2.661285420 |
| C | -2.509640600 | -0.639581270 | -3.053238400 |
| C | -3.291276510 | 0.277790880  | -2.291889120 |
| C | -2.889804940 | 1.633619310  | -2.333220490 |
| C | -3.022668420 | 2.471411020  | -1.160139460 |
| C | -3.572956330 | 1.949292370  | 0.057759760  |
| C | -3.057009680 | 2.460268030  | 1.275866200  |
| C | -2.928336090 | 1.606431270  | 2.442419600  |
| C | -1.748772130 | 2.044412430  | 3.153442980  |
| C | -0.942594960 | 1.101441540  | 3.850254560  |
| C | -1.415289540 | -0.261393550 | 3.902549640  |
| C | -0.454140830 | -1.331375400 | 3.830123650  |
| C | -1.050441430 | -2.429080270 | 3.128468870  |
| C | -0.237577890 | -3.335155680 | 2.354600000  |
| C | -0.817961760 | -3.873522670 | 1.170994230  |
| C | -0.018526530 | -4.115999300 | 0.000093910  |
| C | -0.831152750 | -3.846963060 | -1.156948040 |
| C | -0.271625630 | -3.351486260 | -2.381938600 |
| C | -1.080747780 | -2.482910790 | -3.225823700 |
| C | -0.489225010 | -1.370266390 | -3.986409660 |
| C | -1.375501440 | -0.222703130 | -3.823560490 |
| C | -0.974472710 | 1.160136130  | -3.802090390 |
| C | -1.764283290 | 2.067656820  | -3.100538950 |
| C | -1.263567260 | 3.404238840  | -2.519830090 |
| C | -1.988471000 | 3.420536200  | -1.158739020 |
| C | -1.400153350 | 3.860845300  | 0.054595650  |
| C | -1.983034990 | 3.403849220  | 1.280364580  |
| C | -1.173823980 | 3.153369690  | 2.442849430  |
| C | 1.142990860  | -3.124207510 | -2.380586230 |
| C | 1.727526730  | -2.014027970 | -3.106930700 |
| C | 0.938015230  | -1.091516490 | -3.880794770 |
| C | 1.355794210  | 0.268198630  | -3.839877510 |
| C | 0.470833280  | 1.489248540  | -4.145422340 |
| C | 1.032728700  | 2.521211520  | -3.143867790 |
| C | 0.253264970  | 3.373144170  | -2.355399340 |



|    |              |              |              |
|----|--------------|--------------|--------------|
| C  | 0.800415630  | 3.866221970  | -1.142752700 |
| C  | 0.000934350  | 4.129663670  | 0.043883970  |
| C  | 0.804827860  | 3.861547150  | 1.195322750  |
| C  | 0.238120590  | 3.330182240  | 2.396746740  |
| C  | 1.045085130  | 2.430466100  | 3.157799690  |
| C  | 0.467128580  | 1.330828390  | 3.883202170  |
| C  | 1.405497760  | 0.243352590  | 3.872807400  |
| C  | 0.965505270  | -1.107700570 | 3.814918760  |
| C  | 1.762649470  | -2.045556040 | 3.106621050  |
| C  | 1.173246790  | -3.145164710 | 2.389879370  |
| C  | 1.980219490  | -3.408251360 | 1.224997930  |
| C  | 1.383087660  | -3.843348140 | 0.000684320  |
| C  | 1.962079970  | -3.383100840 | -1.219265230 |
| C  | 3.050148770  | -2.448279390 | -1.223595700 |
| C  | 2.896023100  | -1.594538300 | -2.372952680 |
| C  | 3.267367930  | -0.228287680 | -2.334697910 |
| C  | 2.485842830  | 0.689596840  | -3.092866560 |
| C  | 2.296762450  | 2.058767110  | -2.668660680 |
| C  | 2.845861910  | 2.513851540  | -1.437674680 |
| C  | 2.095236770  | 3.459076880  | -0.703157200 |
| C  | 2.112198130  | 3.445211300  | 0.747358810  |
| C  | 2.921404480  | 2.533363430  | 1.487400340  |
| C  | 2.354317810  | 2.031361080  | 2.709668920  |
| C  | 2.585493290  | 0.669556790  | 3.154503240  |
| C  | 3.393933580  | -0.253695660 | 2.404223980  |
| C  | 2.933550350  | -1.611541800 | 2.382429950  |
| C  | 3.059311980  | -2.465615390 | 1.216335090  |
| C  | 3.576521340  | -1.940770400 | 0.002413700  |
| C  | 4.052328190  | -0.576442440 | 0.028066040  |
| C  | 3.857083290  | 0.258795280  | -1.122891640 |
| C  | 3.679747250  | 1.608988840  | -0.679984210 |
| C  | 3.818431860  | 1.646680780  | 0.759751100  |
| C  | 4.061424780  | 0.264462540  | 1.214437480  |
| Sc | -0.171785320 | -0.977210420 | -1.771409270 |
| Sc | -1.399515030 | -0.476360720 | 1.460624130  |
| Sc | 1.867868580  | 0.439270320  | 0.718079670  |
| N  | 0.067776970  | -0.239843720 | 0.099365010  |
| C  | -1.735601050 | 4.664466170  | -3.324252520 |
| F  | -1.455513710 | 5.788278270  | -2.615747360 |
| F  | -1.121870010 | 4.766333300  | -4.519215710 |
| F  | -3.073484620 | 4.623773020  | -3.537387320 |
| C  | 0.661514780  | 1.863652280  | -5.652049940 |
| F  | 1.953091970  | 2.184942310  | -5.905186780 |
| F  | 0.335829220  | 0.791762180  | -6.425838090 |
| F  | -0.115721380 | 2.894657580  | -6.029996520 |

**PBE/TZ2P Cartesian coordinates of  $\text{Sc}_3\text{N}@C_{80}(\text{CF}_3)_2^+$ , Cnf2,  $\Delta E = 3.8$  kJ/mol**

|   |              |              |              |
|---|--------------|--------------|--------------|
| C | -3.740484410 | -1.539333060 | 0.712885980  |
| C | -3.738171600 | -1.541662180 | -0.727919010 |
| C | -3.956133740 | -0.180776470 | -1.179690100 |
| C | -4.072251060 | 0.652755430  | -0.004112710 |
| C | -3.955057760 | -0.186745050 | 1.155454160  |
| C | -3.347875180 | 0.309490480  | 2.348239060  |
| C | -2.587057180 | -0.612805860 | 3.156738320  |
| C | -2.348830200 | -1.945114610 | 2.661965860  |
| C | -2.910951130 | -2.436515420 | 1.439745480  |
| C | -2.149282550 | -3.401457290 | 0.716136770  |
| C | -2.153518480 | -3.399721960 | -0.723242490 |
| C | -2.933654030 | -2.467366340 | -1.471732880 |
| C | -2.434034880 | -2.014616910 | -2.757927230 |
| C | -2.678643670 | -0.646374450 | -3.246437380 |
| C | -3.408020720 | 0.309545770  | -2.417363940 |
| C | -2.933541700 | 1.661196910  | -2.376633760 |
| C | -3.063859970 | 2.508054890  | -1.213559430 |
| C | -3.603467710 | 2.001844940  | 0.002866150  |
| C | -3.080707500 | 2.522830530  | 1.225887860  |
| C | -2.948151270 | 1.673568560  | 2.373333630  |
| C | -1.763003200 | 2.075144850  | 3.103732350  |
| C | -0.998350750 | 1.164223370  | 3.902591280  |
| C | -1.467408780 | -0.215126950 | 3.994653570  |
| C | -0.499398340 | -1.323915370 | 3.933968110  |
| C | -1.060629480 | -2.369395630 | 3.114875670  |
| C | -0.270292420 | -3.299338090 | 2.344672470  |
| C | -0.853673340 | -3.832323070 | 1.159897690  |
| C | -0.031465720 | -4.084868330 | -0.011707950 |
| C | -0.837664770 | -3.825197640 | -1.160030620 |
| C | -0.265372970 | -3.287242220 | -2.335543270 |
| C | -1.077740650 | -2.374818170 | -3.103145950 |
| C | -0.479035140 | -1.275191970 | -3.793564410 |
| C | -1.433101160 | -0.199757420 | -3.850191200 |
| C | -0.956885600 | 1.164125440  | -3.802443160 |
| C | -1.754864850 | 2.104312850  | -3.098895150 |
| C | -1.173283420 | 3.201691050  | -2.385373060 |
| C | -1.977216660 | 3.447363430  | -1.216041630 |
| C | -1.387829990 | 3.898852450  | 0.005603290  |
| C | -1.979342920 | 3.450424410  | 1.227930930  |
| C | -1.170583690 | 3.182231180  | 2.382186040  |
| C | 1.144976380  | -3.106220810 | -2.352186300 |
| C | 1.733708580  | -1.984269060 | -3.053324660 |
| C | 0.936003570  | -1.054640900 | -3.780416570 |
| C | 1.379166840  | 0.290242940  | -3.839160990 |
| C | 0.451659200  | 1.389834540  | -3.854294330 |
| C | 1.042568340  | 2.479331770  | -3.127935680 |
| C | 0.246461960  | 3.374292620  | -2.352961900 |

|    |              |              |              |
|----|--------------|--------------|--------------|
| C  | 0.822118580  | 3.892311920  | -1.157051310 |
| C  | 0.017004400  | 4.161209920  | 0.005894360  |
| C  | 0.820311670  | 3.914562310  | 1.170839110  |
| C  | 0.240233800  | 3.369632130  | 2.359789800  |
| C  | 1.027969270  | 2.466125820  | 3.135647990  |
| C  | 0.423603050  | 1.377227400  | 3.867012920  |
| C  | 1.362112830  | 0.269132660  | 3.841727380  |
| C  | 0.916805560  | -1.086759230 | 3.816171150  |
| C  | 1.700048370  | -2.025774710 | 3.054594220  |
| C  | 1.129254360  | -3.132648950 | 2.390324090  |
| C  | 2.089454410  | -3.642842050 | 1.299430570  |
| C  | 1.370446970  | -3.860632100 | -0.033056110 |
| C  | 1.958417510  | -3.432538890 | -1.227220670 |
| C  | 3.278136820  | -2.639658110 | -1.323527400 |
| C  | 2.914813910  | -1.586537240 | -2.383934280 |
| C  | 3.358188980  | -0.235266750 | -2.384188940 |
| C  | 2.560402870  | 0.699978640  | -3.124235730 |
| C  | 2.352776990  | 2.065897660  | -2.683461760 |
| C  | 2.937266430  | 2.558210050  | -1.470374230 |
| C  | 2.127490160  | 3.467597830  | -0.714157000 |
| C  | 2.120341910  | 3.485654870  | 0.733015100  |
| C  | 2.864023090  | 2.519009920  | 1.454041760  |
| C  | 2.329729040  | 2.043828650  | 2.693990110  |
| C  | 2.533304300  | 0.690931830  | 3.122568290  |
| C  | 3.264853230  | -0.242661180 | 2.328285210  |
| C  | 2.883196190  | -1.605858160 | 2.334951950  |
| C  | 3.064739770  | -2.453750770 | 1.195377120  |
| C  | 3.573807880  | -1.953704350 | 0.002106530  |
| C  | 4.006284830  | -0.582529520 | -0.030323740 |
| C  | 4.041806450  | 0.273818400  | -1.205198560 |
| C  | 3.829527470  | 1.656198840  | -0.750769300 |
| C  | 3.692552460  | 1.615414300  | 0.690906930  |
| C  | 3.838995890  | 0.250978000  | 1.120316040  |
| Sc | -1.435941630 | -0.448483760 | -1.378797060 |
| Sc | -0.482577740 | -0.069954990 | 1.967123330  |
| Sc | 1.842750060  | 0.567110320  | -0.650239420 |
| N  | -0.012218000 | 0.013233190  | -0.002845350 |
| C  | 2.741622200  | -4.963376510 | 1.836825440  |
| F  | 3.444808870  | -4.720447250 | 2.970657390  |
| F  | 1.767196480  | -5.862968520 | 2.131104230  |
| F  | 3.569399910  | -5.529204660 | 0.939616540  |
| C  | 4.499078770  | -3.461182980 | -1.854323580 |
| F  | 5.533645260  | -2.614071260 | -2.110270690 |
| F  | 4.928399060  | -4.377196240 | -0.966423690 |
| F  | 4.183817350  | -4.097627120 | -3.007391900 |

**PBE/TZ2P Cartesian coordinates of  $\text{Sc}_3\text{N}@C_{80}(\text{CF}_3)_2^+$ , Cnf3,  $\Delta E=4.4$  kJ/mol**

|   |              |              |              |
|---|--------------|--------------|--------------|
| C | -3.774980610 | -1.555827040 | 0.738458440  |
| C | -3.788502640 | -1.553329470 | -0.691498940 |
| C | -3.961911050 | -0.188546200 | -1.134360940 |
| C | -4.069699530 | 0.647924490  | 0.028563550  |
| C | -3.944661340 | -0.193775410 | 1.194933450  |
| C | -3.396755820 | 0.289296760  | 2.430609960  |
| C | -2.674650840 | -0.655111650 | 3.268685090  |
| C | -2.397992980 | -1.970328990 | 2.710910940  |
| C | -2.940326510 | -2.457100020 | 1.465344710  |
| C | -2.192057390 | -3.424493320 | 0.738924700  |
| C | -2.190345840 | -3.411836320 | -0.703474780 |
| C | -2.944491820 | -2.438689810 | -1.422436500 |
| C | -2.393811220 | -1.946495870 | -2.657964070 |
| C | -2.655026610 | -0.628914640 | -3.198874030 |
| C | -3.377768880 | 0.301382100  | -2.349817100 |
| C | -2.941291800 | 1.662225750  | -2.348934800 |
| C | -3.067554010 | 2.507974700  | -1.187950710 |
| C | -3.600833990 | 1.994032540  | 0.030109870  |
| C | -3.056304730 | 2.494371900  | 1.250428530  |
| C | -2.943523800 | 1.653362030  | 2.421809930  |
| C | -1.753672940 | 2.065976360  | 3.144241620  |
| C | -0.972518310 | 1.129947420  | 3.901743770  |
| C | -1.467073830 | -0.234640900 | 3.998887720  |
| C | -0.496012440 | -1.308064940 | 3.870054550  |
| C | -1.081177570 | -2.374631260 | 3.110093530  |
| C | -0.296424690 | -3.309028000 | 2.350264110  |
| C | -0.886962090 | -3.850056270 | 1.176306710  |
| C | -0.085431320 | -4.111951830 | 0.008580660  |
| C | -0.888800130 | -3.827610790 | -1.148865220 |
| C | -0.301087590 | -3.276425770 | -2.325931970 |
| C | -1.082295550 | -2.346204590 | -3.071598020 |
| C | -0.491539950 | -1.282204240 | -3.832735220 |
| C | -1.481700130 | -0.218199970 | -3.971208100 |
| C | -0.986275840 | 1.147531410  | -3.870364380 |
| C | -1.756811310 | 2.071410190  | -3.082868170 |
| C | -1.155286160 | 3.151613950  | -2.348101820 |
| C | -1.963382360 | 3.424625280  | -1.188006450 |
| C | -1.361988660 | 3.868276660  | 0.029149370  |
| C | -1.955308140 | 3.413357870  | 1.250704580  |
| C | -1.147322710 | 3.151704960  | 2.408834190  |
| C | 1.105083200  | -3.094163840 | -2.382164360 |
| C | 1.711594250  | -2.051318060 | -3.149441670 |
| C | 0.934397590  | -1.108927750 | -3.823706340 |
| C | 1.484013520  | 0.272540250  | -4.148267700 |
| C | 0.423309740  | 1.340311810  | -3.825600520 |
| C | 1.022635680  | 2.386752290  | -3.081294990 |
| C | 0.257038040  | 3.322683380  | -2.314444170 |

|    |              |              |              |
|----|--------------|--------------|--------------|
| C  | 0.841480870  | 3.868519870  | -1.138975250 |
| C  | 0.039517390  | 4.133972040  | 0.028186640  |
| C  | 0.845800590  | 3.875389300  | 1.189880140  |
| C  | 0.267197780  | 3.337980060  | 2.377096810  |
| C  | 1.055107970  | 2.436881320  | 3.162112680  |
| C  | 0.447325370  | 1.337614320  | 3.870637980  |
| C  | 1.387542160  | 0.240273650  | 3.865431040  |
| C  | 0.931252690  | -1.103721200 | 3.828077000  |
| C  | 1.716390780  | -2.054929080 | 3.117943460  |
| C  | 1.117474870  | -3.142632240 | 2.394513990  |
| C  | 1.910994250  | -3.392709240 | 1.221642050  |
| C  | 1.306964960  | -3.826050260 | 0.008230350  |
| C  | 1.899180710  | -3.333996640 | -1.200781970 |
| C  | 3.008786350  | -2.455805940 | -1.202929880 |
| C  | 3.113809520  | -1.767369630 | -2.575034800 |
| C  | 3.308271620  | -0.270197830 | -2.380934270 |
| C  | 2.592298850  | 0.651872930  | -3.145692440 |
| C  | 2.341986740  | 1.974628320  | -2.665898970 |
| C  | 2.861553440  | 2.447242890  | -1.432055180 |
| C  | 2.135740450  | 3.429846260  | -0.698465930 |
| C  | 2.143296770  | 3.436729400  | 0.741108970  |
| C  | 2.881545490  | 2.467502370  | 1.478453000  |
| C  | 2.354341180  | 2.021184110  | 2.725857240  |
| C  | 2.563700550  | 0.658551490  | 3.151134520  |
| C  | 3.339366810  | -0.275713860 | 2.386709130  |
| C  | 2.888247040  | -1.631992110 | 2.388746910  |
| C  | 3.014972170  | -2.470163120 | 1.212172690  |
| C  | 3.619487370  | -1.994977670 | -0.001240670 |
| C  | 4.188788310  | -0.653841340 | 0.012136070  |
| C  | 3.901134670  | 0.180516310  | -1.150338870 |
| C  | 3.652509320  | 1.518399220  | -0.690239510 |
| C  | 3.699505230  | 1.533549140  | 0.742362520  |
| C  | 4.026761270  | 0.197339290  | 1.196246870  |
| Sc | -0.949707570 | 0.025025550  | -1.775479470 |
| Sc | -1.104801750 | 0.002164680  | 1.764397170  |
| Sc | 1.970438060  | -0.292025080 | 0.293981370  |
| N  | -0.038494470 | -0.082309780 | 0.041362660  |
| C  | 1.887908030  | 0.422221640  | -5.652317430 |
| F  | 2.405340560  | 1.651011690  | -5.888724860 |
| F  | 2.790910580  | -0.500477430 | -6.033331490 |
| F  | 0.783604580  | 0.272096020  | -6.430943150 |
| C  | 4.288645940  | -2.430667470 | -3.367035950 |
| F  | 4.479687400  | -1.860782540 | -4.571243730 |
| F  | 5.440055740  | -2.299610170 | -2.655614560 |
| F  | 4.056231140  | -3.752151700 | -3.550644900 |

**Cartesian coordinates of  $\text{Sc}_3\text{N}@C_{80}(\text{CF}_3)_2^+$ ,  $\text{Cnf4}$ ,  $\Delta E = 7.4$  kJ/mol**

|   |              |              |              |
|---|--------------|--------------|--------------|
| C | -1.149265410 | 0.827856550  | -3.829260470 |
| C | -0.964238210 | 2.155058380  | -3.292041440 |
| C | -2.085508090 | 2.491767730  | -2.499892850 |
| C | -3.199576900 | 1.453755420  | -2.718561140 |
| C | -2.404325220 | 0.310651080  | -3.378907490 |
| C | -2.557205700 | -1.038406880 | -3.056344240 |
| C | -1.456626140 | -1.928249470 | -3.303041510 |
| C | -0.207134140 | -1.391605830 | -3.767063300 |
| C | -0.020886920 | -0.004610500 | -4.040217180 |
| C | 1.288550710  | 0.533004450  | -3.847731740 |
| C | 1.469312140  | 1.871070510  | -3.360666310 |
| C | 0.345047480  | 2.678430000  | -3.031466640 |
| C | 0.460301450  | 3.574317650  | -1.934910040 |
| C | -0.677859580 | 3.886312650  | -1.112941340 |
| C | -1.988787610 | 3.367954680  | -1.383696960 |
| C | -2.865209150 | 3.138028530  | -0.244654320 |
| C | -3.620111670 | 1.891577880  | -0.256703440 |
| C | -3.754162780 | 0.999159020  | -1.376277680 |
| C | -3.997939340 | -0.349009610 | -1.118301850 |
| C | -3.635255030 | -1.496783440 | -2.083351450 |
| C | -3.038153900 | -2.525482140 | -1.102744010 |
| C | -1.972259810 | -3.429236460 | -1.387424090 |
| C | -1.184254830 | -3.174500220 | -2.588758620 |
| C | 0.274151770  | -3.317573080 | -2.546438100 |
| C | 0.856292680  | -2.221848600 | -3.291641930 |
| C | 2.148427990  | -1.653236420 | -3.014482830 |
| C | 2.354778430  | -0.281500220 | -3.335105040 |
| C | 3.197469340  | 0.551057940  | -2.510069590 |
| C | 2.643251710  | 1.883323830  | -2.528200330 |
| C | 2.720009210  | 2.707880770  | -1.373181800 |
| C | 1.639557890  | 3.600001280  | -1.108763600 |
| C | 1.234831670  | 3.913211790  | 0.233958570  |
| C | -0.197278890 | 4.096403340  | 0.237830710  |
| C | -1.003455660 | 3.771708650  | 1.376567690  |
| C | -2.367870150 | 3.328614340  | 1.121774950  |
| C | -2.859052540 | 2.225445160  | 1.924609130  |
| C | -3.645781240 | 1.373433710  | 1.080972380  |
| C | -3.821771420 | -0.016814940 | 1.352080270  |
| C | -3.994123880 | -0.855487450 | 0.219431380  |
| C | -3.406491740 | -2.172650400 | 0.221705240  |
| C | -2.724103960 | -2.681241970 | 1.373893600  |
| C | -1.648859090 | -3.577065690 | 1.116358620  |
| C | -1.263853970 | -3.915883620 | -0.229418440 |
| C | 0.179350910  | -4.095562310 | -0.216839460 |
| C | 0.971541710  | -3.747690390 | -1.350712180 |
| C | 2.278643060  | -3.208848870 | -1.083005820 |
| C | 2.873094650  | -2.199794240 | -1.920866450 |

|    |              |              |              |
|----|--------------|--------------|--------------|
| C  | 3.704681560  | -1.365418120 | -1.094142250 |
| C  | 3.886275070  | 0.032101950  | -1.366342690 |
| C  | 4.125465710  | 0.905578630  | -0.230174010 |
| C  | 3.453821170  | 2.192454930  | -0.238774200 |
| C  | 3.019385600  | 2.490398380  | 1.096567960  |
| C  | 1.889920530  | 3.344582760  | 1.361229290  |
| C  | 1.118062910  | 3.058723620  | 2.517914520  |
| C  | -0.313070130 | 3.242343630  | 2.514397210  |
| C  | -0.884589630 | 2.223875660  | 3.364915830  |
| C  | -2.154493820 | 1.659999000  | 3.050179830  |
| C  | -2.378491280 | 0.288182380  | 3.363288980  |
| C  | -3.203532790 | -0.539544890 | 2.524838390  |
| C  | -2.661256800 | -1.869258390 | 2.537927000  |
| C  | -1.487437610 | -1.863041020 | 3.372893280  |
| C  | -0.364148240 | -2.687168050 | 3.064394660  |
| C  | -0.477259470 | -3.582422740 | 1.954252240  |
| C  | 0.652665690  | -3.902425230 | 1.133488730  |
| C  | 1.930493000  | -3.321370810 | 1.387473720  |
| C  | 2.746474850  | -3.011178370 | 0.259053630  |
| C  | 3.633257900  | -1.869652470 | 0.261057510  |
| C  | 3.775483030  | -1.008352290 | 1.402153270  |
| C  | 4.086910880  | 0.393343930  | 1.154338220  |
| C  | 3.370799920  | 1.384108760  | 1.948138250  |
| C  | 2.503136160  | 1.052531070  | 3.057289360  |
| C  | 1.419933730  | 1.929067950  | 3.358473020  |
| C  | 0.179469220  | 1.412988280  | 3.875942860  |
| C  | -0.011361800 | 0.008502290  | 4.100534410  |
| C  | -1.314554070 | -0.530870750 | 3.886606690  |
| C  | 0.938454910  | -2.180551150 | 3.367690520  |
| C  | 2.063975330  | -2.488170220 | 2.534648040  |
| C  | 2.939494160  | -1.336819710 | 2.520828970  |
| C  | 2.341222120  | -0.327757750 | 3.366177520  |
| C  | 1.109709590  | -0.848203540 | 3.887989530  |
| N  | 0.055306070  | 0.063146280  | -0.163814250 |
| Sc | -0.451854950 | -1.684306340 | -1.058272580 |
| Sc | -1.168608820 | 1.660290740  | 0.112151490  |
| Sc | 2.020873040  | 0.203039820  | 0.278744780  |
| C  | -4.857771340 | -2.156226670 | -2.801819330 |
| F  | -4.445207380 | -3.275638190 | -3.454101660 |
| F  | -5.802312500 | -2.518433850 | -1.901444310 |
| F  | -5.423646270 | -1.335805330 | -3.706326930 |
| C  | -4.293253180 | 2.098618710  | -3.633180900 |
| F  | -3.769325880 | 2.449842370  | -4.831621980 |
| F  | -5.332583420 | 1.271436250  | -3.849963670 |
| F  | -4.771923670 | 3.222762080  | -3.036199640 |

**Table S3. PBE/TZ2P relative energies of the conformers of  $\text{Sc}_3\text{N}@C_{80}(\text{CF}_3)_2^-$**

| conformer | $\Delta E$ , kJ/mol |
|-----------|---------------------|
| Cnf1      | 0.0                 |
| Cnf2      | 5.5                 |
| Cnf3      | 23.0                |
| Cnf4      | 26.3                |
| Cnf5      | 26.6                |
| Cnf6      | 27.0                |
| Cnf7      | 31.6                |
| Cnf8      | 32.4                |
| Cnf9      | 34.8                |
| Cnf10     | 35.3                |
| Cnf11     | 35.4                |
| Cnf12     | 35.5                |
| Cnf13     | 35.6                |
| Cnf14     | 36.7                |
| Cnf15     | 37.2                |
| Cnf16     | 38.9                |
| Cnf17     | 39.2                |
| Cnf18     | 40.5                |
| Cnf19     | 42.7                |
| Cnf20     | 43.6                |
| Cnf21     | 45.9                |
| Cnf22     | 48.7                |
| Cnf23     | 49.2                |
| Cnf24     | 49.6                |
| Cnf25     | 51.0                |
| Cnf26     | 51.6                |
| Cnf27     | 52.6                |
| Cnf28     | 55.2                |
| Cnf29     | 55.9                |
| Cnf30     | 56.6                |
| Cnf31     | 57.1                |
| Cnf32     | 57.6                |
| Cnf33     | 58.4                |
| Cnf34     | 59.3                |
| Cnf35     | 60.4                |
| Cnf36     | 60.9                |
| Cnf37     | 61.5                |
| Cnf38     | 64.2                |

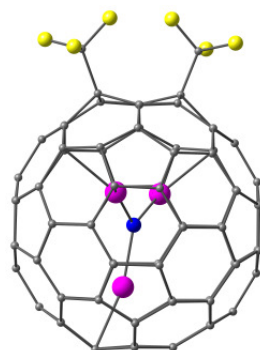

**Cnf1**

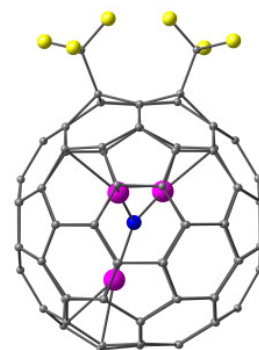

**Cnf2**

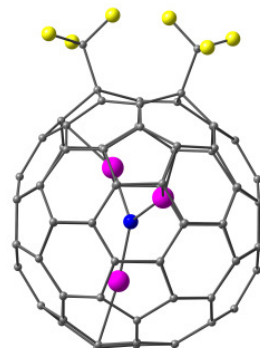

**Cnf3**

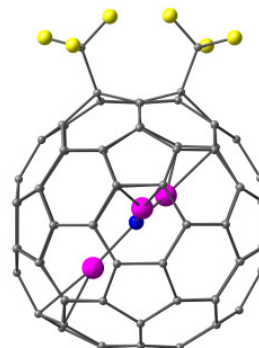

**Cnf4**

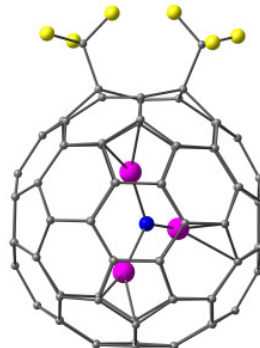

**Cnf18**

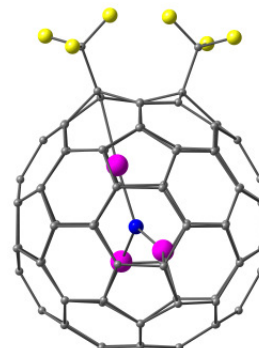

**Cnf38**



**Cartesian coordinates of Sc<sub>3</sub>N@C<sub>80</sub>(CF<sub>3</sub>)<sub>2</sub><sup>-</sup>, Cnf1, ΔE = 0.0 kJ/mol**

|   |              |              |              |
|---|--------------|--------------|--------------|
| C | -3.653495070 | -1.564809780 | 0.702776470  |
| C | -3.685412820 | -1.556434830 | -0.727057430 |
| C | -3.948168050 | -0.220768170 | -1.191662280 |
| C | -4.365759200 | 0.649270080  | 0.014271610  |
| C | -3.878464750 | -0.227361770 | 1.180731970  |
| C | -3.370521120 | 0.243649100  | 2.417852890  |
| C | -2.543505210 | -0.693420010 | 3.138377540  |
| C | -2.314327240 | -2.043012830 | 2.671678350  |
| C | -2.847213740 | -2.493837350 | 1.424596900  |
| C | -2.103538870 | -3.464230990 | 0.690428520  |
| C | -2.099049560 | -3.437625300 | -0.745069490 |
| C | -2.841904730 | -2.449319500 | -1.450634140 |
| C | -2.280977710 | -1.948463090 | -2.664227540 |
| C | -2.529314660 | -0.610644240 | -3.142491630 |
| C | -3.323886590 | 0.283580150  | -2.339432620 |
| C | -3.139359860 | 1.783065170  | -2.541662570 |
| C | -3.078675960 | 2.500979080  | -1.174637280 |
| C | -3.580614130 | 1.954997680  | 0.014371970  |
| C | -3.033019580 | 2.411199220  | 1.263699710  |
| C | -3.004771550 | 1.657761310  | 2.513301860  |
| C | -1.769159020 | 2.048651180  | 3.210196490  |
| C | -0.918239070 | 1.079818690  | 3.862949890  |
| C | -1.359773050 | -0.285449850 | 3.862465120  |
| C | -0.426162000 | -1.385775070 | 3.855774330  |
| C | -1.021364750 | -2.470270600 | 3.121388040  |
| C | -0.225629600 | -3.360737950 | 2.329085490  |
| C | -0.799834530 | -3.890481030 | 1.134772980  |
| C | 0.005984530  | -4.145112650 | -0.032578570 |
| C | -0.794915820 | -3.859969290 | -1.197709120 |
| C | -0.208413440 | -3.316555610 | -2.375363420 |
| C | -1.000132870 | -2.382243780 | -3.139379620 |
| C | -0.442132140 | -1.323069240 | -3.947146840 |
| C | -1.419121230 | -0.223095850 | -4.004437880 |
| C | -0.957443050 | 1.161290130  | -3.872410910 |
| C | -1.717338070 | 2.045921340  | -3.066898210 |
| C | -1.131814030 | 3.124322580  | -2.319584530 |
| C | -1.945758360 | 3.380508260  | -1.169568840 |
| C | -1.332782670 | 3.807035290  | 0.046455740  |
| C | -1.904430050 | 3.306713150  | 1.252038500  |
| C | -1.117656890 | 3.076485270  | 2.428446800  |
| C | 1.209696350  | -3.155245760 | -2.418835720 |
| C | 1.796049600  | -2.048233220 | -3.135852710 |
| C | 0.978284180  | -1.089929130 | -3.832320280 |
| C | 1.413435310  | 0.277143410  | -3.833405060 |
| C | 0.469763080  | 1.369952860  | -3.829230330 |
| C | 1.076028140  | 2.459702030  | -3.091589310 |

|    |              |              |              |
|----|--------------|--------------|--------------|
| C  | 0.282429710  | 3.332237020  | -2.288090180 |
| C  | 0.864570710  | 3.879230210  | -1.106796210 |
| C  | 0.058319770  | 4.108688600  | 0.061017270  |
| C  | 0.867788140  | 3.851982030  | 1.226922250  |
| C  | 0.306569630  | 3.300476290  | 2.413811740  |
| C  | 1.105990890  | 2.427043320  | 3.210477540  |
| C  | 0.498386650  | 1.310992820  | 3.896679740  |
| C  | 1.425975990  | 0.210100940  | 3.871082050  |
| C  | 0.979156570  | -1.146979290 | 3.817961900  |
| C  | 1.782692050  | -2.081337470 | 3.093985340  |
| C  | 1.191761920  | -3.170767800 | 2.360038170  |
| C  | 1.993540420  | -3.417555330 | 1.194700200  |
| C  | 1.405509400  | -3.866776490 | -0.031778510 |
| C  | 2.001182400  | -3.405797560 | -1.245829860 |
| C  | 3.085966640  | -2.452022600 | -1.231121180 |
| C  | 2.960352100  | -1.621821650 | -2.414602210 |
| C  | 3.340332240  | -0.247939600 | -2.355965040 |
| C  | 2.595808660  | 0.697423840  | -3.120525830 |
| C  | 2.382331690  | 2.047381330  | -2.665758350 |
| C  | 2.909480900  | 2.498450830  | -1.417300420 |
| C  | 2.171218730  | 3.457642480  | -0.667619320 |
| C  | 2.177763680  | 3.445910130  | 0.774912180  |
| C  | 2.924429700  | 2.479049440  | 1.509670510  |
| C  | 2.404568840  | 2.013602720  | 2.753363460  |
| C  | 2.605650330  | 0.639907300  | 3.159933180  |
| C  | 3.398037590  | -0.280757870 | 2.394807550  |
| C  | 2.959732540  | -1.648924900 | 2.382467270  |
| C  | 3.095179820  | -2.484041450 | 1.200419970  |
| C  | 3.679600130  | -1.983532270 | -0.013494400 |
| C  | 4.219152670  | -0.630181930 | 0.013631030  |
| C  | 3.953802180  | 0.218652380  | -1.138024110 |
| C  | 3.698054400  | 1.558806230  | -0.675851100 |
| C  | 3.740601070  | 1.554043610  | 0.758807120  |
| C  | 4.076648430  | 0.214304000  | 1.210202010  |
| Sc | -0.481812860 | -0.089447240 | -1.957232070 |
| Sc | -1.317739680 | 0.674490250  | 1.384299580  |
| Sc | 1.993010780  | -0.297507990 | 0.381575670  |
| N  | 0.063927130  | 0.102680570  | 0.006572200  |
| C  | -5.898588710 | 0.863410260  | 0.154061570  |
| F  | -6.424740190 | 1.650600540  | -0.816076270 |
| F  | -6.576851660 | -0.319027210 | 0.128059680  |
| F  | -6.186497380 | 1.463559240  | 1.348858910  |
| C  | -4.162702470 | 2.389978610  | -3.540917320 |
| F  | -3.991288000 | 3.735041790  | -3.682919600 |
| F  | -4.003279520 | 1.833341690  | -4.779754460 |
| F  | -5.453521910 | 2.184386250  | -3.182470830 |

**Cartesian coordinates of  $\text{Sc}_3\text{N}@C_{80}(\text{CF}_3)_2^-$ , Cnf2,  $\Delta E = 5.5$  kJ/mol**

|   |              |              |              |
|---|--------------|--------------|--------------|
| C | -1.150708900 | 0.834467730  | -3.802491300 |
| C | -0.999792900 | 2.172328630  | -3.311111850 |
| C | -2.141241370 | 2.525746180  | -2.516925250 |
| C | -3.221583230 | 1.435861150  | -2.694907250 |
| C | -2.382914170 | 0.296626060  | -3.298794980 |
| C | -2.583542410 | -1.088008710 | -3.070047030 |
| C | -1.432476060 | -1.923079610 | -3.311684870 |
| C | -0.187662720 | -1.398798780 | -3.828450420 |
| C | -0.017489280 | -0.000453460 | -4.046986730 |
| C | 1.285614370  | 0.552849720  | -3.866375290 |
| C | 1.442974050  | 1.879694970  | -3.337431930 |
| C | 0.301718100  | 2.670324800  | -3.011761700 |
| C | 0.406016840  | 3.535531700  | -1.883508680 |
| C | -0.728451020 | 3.892918230  | -1.067325340 |
| C | -2.010088080 | 3.312424230  | -1.362154180 |
| C | -3.037872740 | 3.245395350  | -0.238319830 |
| C | -3.719332450 | 1.858581500  | -0.230906820 |
| C | -3.748652770 | 0.995272400  | -1.335470700 |
| C | -3.925252240 | -0.415103860 | -1.103583980 |
| C | -3.476375490 | -1.489668820 | -1.980670070 |
| C | -3.101277290 | -2.617724960 | -1.106794150 |
| C | -1.900397030 | -3.391107870 | -1.323077930 |
| C | -1.110692070 | -3.059945160 | -2.478532840 |
| C | 0.318750900  | -3.236518280 | -2.490266400 |
| C | 0.888183420  | -2.214084450 | -3.331124470 |
| C | 2.159021200  | -1.633409620 | -3.040438650 |
| C | 2.358764740  | -0.258334520 | -3.356809230 |
| C | 3.191249850  | 0.571829300  | -2.517076700 |
| C | 2.623303010  | 1.900654530  | -2.512631980 |
| C | 2.708912950  | 2.729700730  | -1.357906060 |
| C | 1.590252020  | 3.592512570  | -1.079081820 |
| C | 1.208417380  | 4.008962690  | 0.252088760  |
| C | -0.240561600 | 4.266278920  | 0.260001650  |
| C | -1.051235860 | 3.823769340  | 1.398538560  |
| C | -2.299220190 | 3.209274640  | 1.113126360  |
| C | -2.867620450 | 2.166172940  | 1.929483320  |
| C | -3.708488910 | 1.347812660  | 1.111770330  |
| C | -3.806131320 | -0.049522450 | 1.383309600  |
| C | -3.923612770 | -0.910331950 | 0.250474570  |
| C | -3.403474930 | -2.246693410 | 0.257013250  |
| C | -2.691918290 | -2.750600380 | 1.408777880  |
| C | -1.609416130 | -3.643578710 | 1.161035190  |
| C | -1.209903910 | -3.946404720 | -0.192307080 |
| C | 0.218541410  | -4.118377460 | -0.203117900 |
| C | 0.994522910  | -3.713117630 | -1.328437590 |
| C | 2.298564580  | -3.167936170 | -1.071623460 |
| C | 2.894143380  | -2.164810570 | -1.917324980 |

|    |              |              |              |
|----|--------------|--------------|--------------|
| C  | 3.832018230  | -1.386887450 | -1.126547790 |
| C  | 3.889005300  | 0.046356180  | -1.379519220 |
| C  | 4.002372180  | 0.915842640  | -0.244582220 |
| C  | 3.453758790  | 2.254525800  | -0.241584410 |
| C  | 3.037111460  | 2.560236920  | 1.101157510  |
| C  | 1.885371110  | 3.382588050  | 1.360921020  |
| C  | 1.098663200  | 3.066466090  | 2.515943870  |
| C  | -0.336342000 | 3.254185920  | 2.519707160  |
| C  | -0.894383970 | 2.206038670  | 3.347640420  |
| C  | -2.162819030 | 1.621752230  | 3.043814790  |
| C  | -2.364593210 | 0.251323380  | 3.380559410  |
| C  | -3.184585290 | -0.582707820 | 2.546545730  |
| C  | -2.627966380 | -1.913729990 | 2.558469790  |
| C  | -1.454152710 | -1.894672940 | 3.396119750  |
| C  | -0.321921490 | -2.709406930 | 3.085417380  |
| C  | -0.429848790 | -3.616217230 | 1.985891390  |
| C  | 0.702089790  | -3.910287740 | 1.142966660  |
| C  | 1.968545120  | -3.308390110 | 1.394373510  |
| C  | 2.813851890  | -2.993790460 | 0.261741720  |
| C  | 3.789734530  | -1.914950640 | 0.251948220  |
| C  | 3.783739460  | -0.998611200 | 1.386804510  |
| C  | 3.935512780  | 0.405986950  | 1.109381220  |
| C  | 3.332456600  | 1.424380390  | 1.934771070  |
| C  | 2.508022360  | 1.075048310  | 3.050784210  |
| C  | 1.411453700  | 1.935291450  | 3.357402220  |
| C  | 0.177868520  | 1.407223660  | 3.869424060  |
| C  | 0.009622690  | 0.002830660  | 4.108571140  |
| C  | -1.289173220 | -0.555089460 | 3.900175820  |
| C  | 0.977226650  | -2.185187300 | 3.391176090  |
| C  | 2.098562760  | -2.482618880 | 2.548521730  |
| C  | 2.966973800  | -1.321292350 | 2.518102850  |
| C  | 2.368031000  | -0.310582320 | 3.356898540  |
| C  | 1.139506440  | -0.842276010 | 3.887540470  |
| N  | 0.060873700  | 0.069248880  | -0.176465300 |
| Sc | -1.547721230 | -0.889161160 | -0.982443470 |
| Sc | -0.051588390 | 2.027861120  | 0.337286740  |
| Sc | 1.897527910  | -0.713942190 | -0.121691320 |
| C  | -4.351669810 | 1.809173120  | -3.694420800 |
| F  | -5.138689200 | 0.720241040  | -3.948965550 |
| F  | -5.172163490 | 2.788084720  | -3.241363670 |
| F  | -3.848097840 | 2.225674890  | -4.891584220 |
| C  | -4.021226840 | 4.448526410  | -0.242605410 |
| F  | -4.701461340 | 4.585989020  | -1.407132100 |
| F  | -4.943483190 | 4.348791570  | 0.756134220  |
| F  | -3.340140510 | 5.618051770  | -0.043287910 |

**Table S4. PBE/TZ2P relative energies of the conformers of  $\text{Sc}_3\text{N}@C_{80}(\text{CF}_3)_2^{3-}$**

| conformer | $\Delta E$ , kJ/mol |
|-----------|---------------------|
| Cnf1      | 0.0                 |
| Cnf2*     | 7.8                 |
| Cnf3*     | 6.6                 |
| Cnf4      | 18.8                |
| Cnf5      | 26.7                |
| Cnf6      | 28.3                |
| Cnf7      | 32.1                |
| Cnf8      | 32.8                |
| Cnf9      | 34.2                |
| Cnf10     | 34.4                |
| Cnf11     | 35.4                |
| Cnf12     | 36.1                |
| Cnf13     | 37.0                |
| Cnf14     | 37.6                |
| Cnf15     | 38.1                |
| Cnf16     | 38.4                |
| Cnf17     | 39.2                |
| Cnf18     | 39.6                |
| Cnf19     | 39.7                |
| Cnf20     | 40.4                |
| Cnf21     | 40.7                |
| Cnf22     | 41.1                |
| Cnf23     | 41.2                |
| Cnf24     | 41.7                |
| Cnf25     | 42.1                |
| Cnf26     | 42.4                |
| Cnf27     | 42.6                |
| Cnf28     | 43.1                |
| Cnf29     | 44.3                |
| Cnf30     | 46.5                |
| Cnf31     | 46.9                |
| Cnf32     | 54.1                |
| Cnf33     | 69.3                |

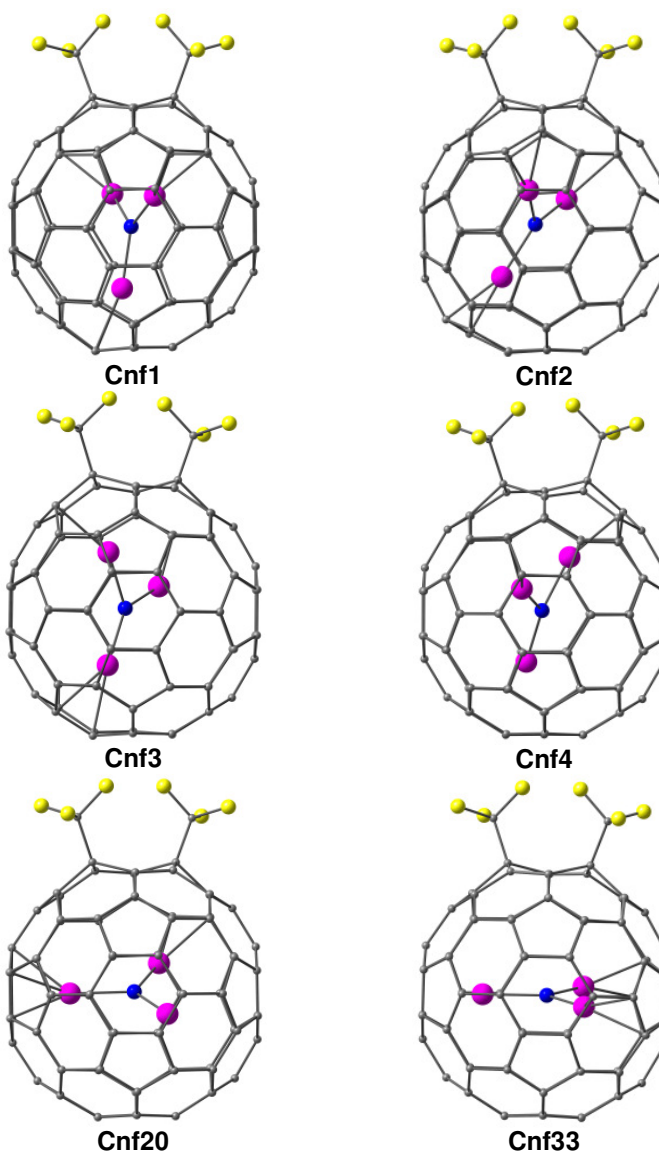

\* for the sake of comparison to  $\text{Sc}_3\text{N}@C_{80}(\text{CF}_3)_2$  and  $\text{Sc}_3\text{N}@C_{80}(\text{CF}_3)_2^-$ , **Cnf2** is the structure with the relative energy 7.8 kJ/mol, while the lower energy structure (6.6 kJ/mol) is titled **Cnf3**.

**Cartesian coordinates of  $\text{Sc}_3\text{N}@C_{80}(\text{CF}_3)_2^{3-}$ , Cnf1,  $\Delta E = 0.0$  kJ/mol**

|   |              |              |              |
|---|--------------|--------------|--------------|
| C | -3.821888370 | -1.582088470 | 0.733241510  |
| C | -3.819674040 | -1.569690780 | -0.708426400 |
| C | -3.999467460 | -0.205605670 | -1.143439860 |
| C | -4.119633550 | 0.626871780  | 0.026433810  |
| C | -3.993069760 | -0.222534560 | 1.189091120  |
| C | -3.394159760 | 0.260166790  | 2.408886430  |
| C | -2.657836260 | -0.675504810 | 3.251972590  |
| C | -2.384397890 | -1.989526370 | 2.693146530  |
| C | -2.945020580 | -2.467203200 | 1.451944420  |
| C | -2.183368980 | -3.430456440 | 0.718594200  |
| C | -2.185743990 | -3.417278170 | -0.725935900 |
| C | -2.952207150 | -2.445120620 | -1.441725170 |
| C | -2.381141460 | -1.938934060 | -2.668720150 |
| C | -2.650844540 | -0.621889610 | -3.200354240 |
| C | -3.374251360 | 0.291955390  | -2.343392080 |
| C | -2.938075870 | 1.665381860  | -2.345979660 |
| C | -3.071093230 | 2.500563800  | -1.177159140 |
| C | -3.613571070 | 1.974913990  | 0.036492920  |
| C | -3.072758710 | 2.481174360  | 1.259099820  |
| C | -2.944215610 | 1.631486110  | 2.420801000  |
| C | -1.764252950 | 2.051263880  | 3.150093660  |
| C | -0.963436720 | 1.118006870  | 3.910201790  |
| C | -1.459315820 | -0.250741610 | 3.989070020  |
| C | -0.476019540 | -1.317622650 | 3.860470900  |
| C | -1.063751420 | -2.394429230 | 3.098232460  |
| C | -0.282357620 | -3.326677950 | 2.345501920  |
| C | -0.873194520 | -3.853502380 | 1.155802620  |
| C | -0.069137010 | -4.108413740 | -0.012796890 |
| C | -0.874831440 | -3.823257450 | -1.169622360 |
| C | -0.275489870 | -3.256506290 | -2.337728090 |
| C | -1.061518570 | -2.324894450 | -3.081853520 |
| C | -0.474685040 | -1.247912120 | -3.844847810 |
| C | -1.480962610 | -0.194651090 | -3.991870790 |
| C | -0.976593340 | 1.174673830  | -3.872042030 |
| C | -1.763850740 | 2.089126090  | -3.073037870 |
| C | -1.166180530 | 3.186680350  | -2.333374310 |
| C | -1.973830810 | 3.437074250  | -1.173736360 |
| C | -1.384284320 | 3.886609740  | 0.055385790  |
| C | -1.974699340 | 3.418512070  | 1.270159900  |
| C | -1.167120440 | 3.154529290  | 2.432025620  |
| C | 1.139303080  | -3.079450240 | -2.386747120 |
| C | 1.745121630  | -2.031021660 | -3.169927090 |
| C | 0.948292630  | -1.062196100 | -3.818227030 |
| C | 1.495163710  | 0.321519680  | -4.160559270 |
| C | 0.427707870  | 1.380654280  | -3.829903980 |
| C | 1.038688040  | 2.470092380  | -3.096327530 |
| C | 0.254087240  | 3.365878820  | -2.302439390 |

|    |              |              |              |
|----|--------------|--------------|--------------|
| C  | 0.826554090  | 3.907196190  | -1.108004030 |
| C  | 0.018954680  | 4.160257270  | 0.061089170  |
| C  | 0.826960860  | 3.897669520  | 1.229184020  |
| C  | 0.252009290  | 3.351028120  | 2.417991160  |
| C  | 1.052083660  | 2.459294130  | 3.216552960  |
| C  | 0.457462620  | 1.348527660  | 3.916095720  |
| C  | 1.420865870  | 0.261450700  | 3.934806650  |
| C  | 0.944023510  | -1.090345110 | 3.820635510  |
| C  | 1.734476500  | -2.044683380 | 3.104518970  |
| C  | 1.137921360  | -3.138865960 | 2.372737230  |
| C  | 1.935396730  | -3.390230580 | 1.209166330  |
| C  | 1.333888210  | -3.819271680 | -0.021866950 |
| C  | 1.933821110  | -3.359260940 | -1.231604980 |
| C  | 3.038879770  | -2.415411010 | -1.214218740 |
| C  | 3.145511270  | -1.727152830 | -2.585815850 |
| C  | 3.309823230  | -0.223461170 | -2.372117890 |
| C  | 2.607395600  | 0.711950350  | -3.160113970 |
| C  | 2.329414560  | 2.039993330  | -2.662293990 |
| C  | 2.848273400  | 2.493288650  | -1.413893580 |
| C  | 2.122875590  | 3.473343340  | -0.663714230 |
| C  | 2.130750740  | 3.469953340  | 0.778356340  |
| C  | 2.877205200  | 2.500451660  | 1.517947400  |
| C  | 2.362465980  | 2.048844520  | 2.773632500  |
| C  | 2.582691410  | 0.689500980  | 3.207746120  |
| C  | 3.325304260  | -0.237584010 | 2.387955700  |
| C  | 2.906048040  | -1.617795110 | 2.381881770  |
| C  | 3.042896460  | -2.447632670 | 1.208192380  |
| C  | 3.655866820  | -1.968556490 | -0.013341350 |
| C  | 4.216334850  | -0.614813910 | 0.019170630  |
| C  | 3.912284520  | 0.220875120  | -1.144968050 |
| C  | 3.644225980  | 1.563514110  | -0.676780740 |
| C  | 3.683556350  | 1.572148110  | 0.756996640  |
| C  | 4.000690920  | 0.237285980  | 1.205043050  |
| Sc | -0.887539820 | 0.038426260  | -1.827210450 |
| Sc | -1.053377050 | 0.000794450  | 1.742201770  |
| Sc | 1.977989170  | -0.382525390 | 0.169563870  |
| N  | -0.032641070 | -0.080312620 | 0.012276180  |
| C  | 4.320447910  | -2.354182740 | -3.384274840 |
| F  | 4.535404790  | -1.797484630 | -4.612914970 |
| F  | 5.510399470  | -2.227150470 | -2.704981250 |
| F  | 4.150374070  | -3.698968490 | -3.600157410 |
| C  | 1.899542480  | 0.457364290  | -5.653731930 |
| F  | 2.428911450  | 1.689392630  | -5.946367930 |
| F  | 2.817186220  | -0.460162730 | -6.079306760 |
| F  | 0.810878060  | 0.306348680  | -6.482255270 |

**Cartesian coordinates of Sc<sub>3</sub>N@C<sub>80</sub>(CF<sub>3</sub>)<sub>2</sub><sup>3-</sup>, Cnf2, ΔE = 7.8 kJ/mol**

|   |              |              |              |
|---|--------------|--------------|--------------|
| C | -1.154051120 | 0.858166650  | -3.885718840 |
| C | -0.989400530 | 2.191767600  | -3.358161910 |
| C | -2.124076060 | 2.477136940  | -2.513301010 |
| C | -2.989336450 | 1.326205620  | -2.523766890 |
| C | -2.387179830 | 0.322625640  | -3.364580100 |
| C | -2.519502270 | -1.072316910 | -3.062460580 |
| C | -1.417386670 | -1.928469830 | -3.368262440 |
| C | -0.183182410 | -1.396204310 | -3.893007990 |
| C | -0.017681010 | 0.012209970  | -4.103348030 |
| C | 1.283626170  | 0.575054870  | -3.895233880 |
| C | 1.444788870  | 1.917543670  | -3.382635070 |
| C | 0.304879530  | 2.712546810  | -3.057841840 |
| C | 0.414488040  | 3.597646050  | -1.915370300 |
| C | -0.716355880 | 3.879759240  | -1.069826070 |
| C | -1.991876870 | 3.272938300  | -1.332828790 |
| C | -2.815193630 | 2.978091740  | -0.204391520 |
| C | -3.687297970 | 1.843522000  | -0.220310910 |
| C | -3.732462710 | 0.972158570  | -1.354465590 |
| C | -3.943618860 | -0.420501690 | -1.104141580 |
| C | -3.338980580 | -1.426338130 | -1.938101320 |
| C | -3.018900190 | -2.557554340 | -1.111820980 |
| C | -1.867053540 | -3.371147460 | -1.374621580 |
| C | -1.098151610 | -3.066982630 | -2.538003230 |
| C | 0.337415940  | -3.238800570 | -2.546505200 |
| C | 0.898621170  | -2.197785470 | -3.377465750 |
| C | 2.160995410  | -1.606250840 | -3.066036850 |
| C | 2.358839700  | -0.224333570 | -3.373552730 |
| C | 3.192135310  | 0.620053850  | -2.544330170 |
| C | 2.623657530  | 1.943947470  | -2.552143810 |
| C | 2.682570270  | 2.774296620  | -1.378677600 |
| C | 1.609794130  | 3.698863220  | -1.116113890 |
| C | 1.228231580  | 4.118431330  | 0.245000100  |
| C | -0.245319450 | 4.180830290  | 0.275026330  |
| C | -1.056620680 | 3.748583200  | 1.389083830  |
| C | -2.364267330 | 3.252891310  | 1.136524280  |
| C | -3.153067560 | 2.343335430  | 2.105907950  |
| C | -3.745448990 | 1.310512400  | 1.125219260  |
| C | -3.945324070 | -0.067079500 | 1.407648970  |
| C | -4.015995180 | -0.936866450 | 0.250410530  |
| C | -3.433621320 | -2.262708930 | 0.239584180  |
| C | -2.712825880 | -2.786840830 | 1.376608910  |
| C | -1.596480890 | -3.661857920 | 1.105355500  |
| C | -1.194057720 | -3.955207130 | -0.247511100 |
| C | 0.235820830  | -4.123609860 | -0.255165170 |
| C | 1.021227140  | -3.710689950 | -1.383087530 |
| C | 2.356603920  | -3.206326510 | -1.126224000 |
| C | 2.887755020  | -2.145793420 | -1.942773140 |



|    |              |              |              |
|----|--------------|--------------|--------------|
| C  | 3.752432750  | -1.322050580 | -1.124479170 |
| C  | 3.836673380  | 0.098008020  | -1.375855610 |
| C  | 4.029973110  | 0.980296320  | -0.251722170 |
| C  | 3.428980900  | 2.283779790  | -0.249275250 |
| C  | 2.988679890  | 2.576637220  | 1.094157940  |
| C  | 1.868211050  | 3.445721250  | 1.375369490  |
| C  | 1.068266850  | 3.081727000  | 2.494727340  |
| C  | -0.384486370 | 3.514027820  | 2.742652760  |
| C  | -0.949815500 | 2.229776110  | 3.406507430  |
| C  | -2.189176560 | 1.642840650  | 3.055920530  |
| C  | -2.390680600 | 0.244479580  | 3.309639240  |
| C  | -3.339271830 | -0.635799400 | 2.619077400  |
| C  | -2.706907920 | -1.975479170 | 2.575254110  |
| C  | -1.456015940 | -1.906107550 | 3.305037820  |
| C  | -0.311971890 | -2.738343250 | 3.023192250  |
| C  | -0.416537940 | -3.670926530 | 1.936103220  |
| C  | 0.724072270  | -3.943668350 | 1.091109500  |
| C  | 2.010996880  | -3.339075380 | 1.335679810  |
| C  | 2.913060590  | -3.082709900 | 0.218276590  |
| C  | 3.790985070  | -1.895502400 | 0.218874730  |
| C  | 3.772577990  | -0.961771470 | 1.340550300  |
| C  | 3.947108940  | 0.451832040  | 1.091840740  |
| C  | 3.332319670  | 1.445609660  | 1.925967420  |
| C  | 2.483095390  | 1.081397610  | 3.031375260  |
| C  | 1.385141930  | 1.928084600  | 3.318620090  |
| C  | 0.149078220  | 1.405044690  | 3.825505400  |
| C  | 0.005300170  | 0.002268230  | 4.029703030  |
| C  | -1.284475410 | -0.557381550 | 3.769820810  |
| C  | 0.974188790  | -2.191028970 | 3.323770570  |
| C  | 2.114978520  | -2.477502100 | 2.490293670  |
| C  | 2.971631870  | -1.312211760 | 2.489840120  |
| C  | 2.367677640  | -0.315745470 | 3.334605440  |
| C  | 1.133007200  | -0.851191520 | 3.831896950  |
| N  | 0.093388390  | 0.033291030  | 0.361612580  |
| Sc | -1.674373760 | -0.515759010 | 1.119171060  |
| Sc | 0.479852770  | 1.999338010  | 0.125634120  |
| Sc | 1.637395560  | -1.195461620 | 0.105632650  |
| C  | -4.317280560 | 3.056764390  | 2.847434760  |
| F  | -5.115325340 | 2.153047230  | 3.511466800  |
| F  | -3.916059870 | 3.957817590  | 3.791648150  |
| F  | -5.147661110 | 3.740878070  | 1.995926640  |
| C  | -0.407821790 | 4.769495610  | 3.659498270  |
| F  | -1.652651830 | 5.275790990  | 3.905303020  |
| F  | 0.157647160  | 4.532443920  | 4.887842590  |
| F  | 0.310945860  | 5.802634640  | 3.104316940  |

**Cartesian coordinates of  $\text{Sc}_3\text{N}@C_{80}(\text{CF}_3)_2^{3-}$ , Cnf3,  $\Delta E = 6.6$  kJ/mol**

|   |              |              |              |
|---|--------------|--------------|--------------|
| C | -3.777054000 | -1.616829980 | 0.745448100  |
| C | -3.769167930 | -1.610473790 | -0.687326690 |
| C | -3.939704940 | -0.241596720 | -1.137730220 |
| C | -4.076203230 | 0.590209210  | 0.027544410  |
| C | -3.951769710 | -0.252385820 | 1.190775670  |
| C | -3.357855230 | 0.238647910  | 2.406264000  |
| C | -2.628999700 | -0.685963490 | 3.264668180  |
| C | -2.347786820 | -2.004567290 | 2.720972450  |
| C | -2.901113460 | -2.493868020 | 1.483218850  |
| C | -2.124178400 | -3.449388560 | 0.758447130  |
| C | -2.120701320 | -3.442044930 | -0.683443370 |
| C | -2.879961260 | -2.464856560 | -1.417256660 |
| C | -2.354164590 | -1.968764030 | -2.661565560 |
| C | -2.709267090 | -0.678281730 | -3.261848020 |
| C | -3.371490910 | 0.248080810  | -2.371047450 |
| C | -2.938251310 | 1.621404640  | -2.356277270 |
| C | -3.070664800 | 2.460605580  | -1.180771820 |
| C | -3.615028650 | 1.954431810  | 0.034209690  |
| C | -3.069046390 | 2.460617230  | 1.257115890  |
| C | -2.931530200 | 1.615375490  | 2.416561480  |
| C | -1.755120780 | 2.042744950  | 3.147558140  |
| C | -0.954925450 | 1.122854070  | 3.919642840  |
| C | -1.437590410 | -0.251209600 | 4.011372590  |
| C | -0.452188000 | -1.312290440 | 3.902740200  |
| C | -1.026639450 | -2.392917900 | 3.140405560  |
| C | -0.223091430 | -3.316868200 | 2.389245130  |
| C | -0.811136030 | -3.858539490 | 1.205856400  |
| C | 0.004271920  | -4.104405650 | 0.043627170  |
| C | -0.812375470 | -3.832052850 | -1.120217250 |
| C | -0.242073980 | -3.233235620 | -2.279812390 |
| C | -1.033204950 | -2.326277200 | -3.061972600 |
| C | -0.467054790 | -1.288738080 | -3.904161770 |
| C | -1.553512300 | -0.236022320 | -4.251729800 |
| C | -0.962324120 | 1.166545860  | -3.898355960 |
| C | -1.749270260 | 2.038432930  | -3.074697220 |
| C | -1.159651810 | 3.130901760  | -2.323164500 |
| C | -1.980117300 | 3.400414860  | -1.175922160 |
| C | -1.390341010 | 3.859316540  | 0.050184260  |
| C | -1.981254410 | 3.405299590  | 1.269076520  |
| C | -1.169530150 | 3.148806440  | 2.433684720  |
| C | 1.168152920  | -3.019743280 | -2.277666560 |
| C | 1.753156440  | -1.915613280 | -2.990121540 |
| C | 0.925261770  | -0.997377020 | -3.717933840 |
| C | 1.525849350  | 0.331715840  | -4.113712790 |
| C | 0.448920130  | 1.397225870  | -3.852912810 |
| C | 1.044486720  | 2.454670190  | -3.081855460 |
| C | 0.248069910  | 3.344718170  | -2.292092780 |

|    |              |               |              |
|----|--------------|---------------|--------------|
| C  | 0.820864460  | 3.904216690   | -1.103539820 |
| C  | 0.008856580  | 4.152195740   | 0.059299200  |
| C  | 0.818838240  | 3.906324850   | 1.231705730  |
| C  | 0.247463490  | 3.358283680   | 2.421800950  |
| C  | 1.053081660  | 2.473334910   | 3.217848410  |
| C  | 0.466540580  | 1.365171170   | 3.931680210  |
| C  | 1.426446040  | 0.284599200   | 3.949486770  |
| C  | 0.972405580  | -1.074616650  | 3.864959790  |
| C  | 1.781851940  | -2.027056730  | 3.166367090  |
| C  | 1.194808130  | -3.135359170  | 2.448194550  |
| C  | 2.008545900  | -3.392170970  | 1.290661100  |
| C  | 1.404858390  | -3.821751700  | 0.066424050  |
| C  | 2.003845040  | -3.330391310  | -1.156112660 |
| C  | 3.181966430  | -2.478668640  | -1.201247750 |
| C  | 3.044721160  | -1.615466520  | -2.397356810 |
| C  | 3.397400670  | -0.193619940  | -2.353473490 |
| C  | 2.598317220  | 0.725827340   | -3.079564940 |
| C  | 2.357065670  | 2.072970030   | -2.641757450 |
| C  | 2.888374670  | 2.544661640   | -1.401542080 |
| C  | 2.128563890  | 3.502620250   | -0.655318270 |
| C  | 2.128784880  | 3.499532220   | 0.785522800  |
| C  | 2.889374490  | 2.535862440   | 1.528184450  |
| C  | 2.362809420  | 2.066155520   | 2.767901530  |
| C  | 2.593757020  | 0.711004790   | 3.219997680  |
| C  | 3.343644750  | -0.215404250  | 2.429858190  |
| C  | 2.958805270  | -1.601460690  | 2.450049910  |
| C  | 3.104506080  | -2.442885230  | 1.287071780  |
| C  | 3.676858730  | -1.9444446720 | 0.056123050  |
| C  | 4.108722100  | -0.560639780  | 0.056269070  |
| C  | 3.964822090  | 0.288857040   | -1.114708300 |
| C  | 3.715164520  | 1.637764910   | -0.657304970 |
| C  | 3.719606180  | 1.631422230   | 0.780378290  |
| C  | 3.939478150  | 0.280561400   | 1.222448390  |
| Sc | -1.022836780 | -0.061369630  | -1.801120900 |
| Sc | -0.969657470 | -0.105706200  | 1.772866400  |
| Sc | 1.738718160  | -0.781284880  | -0.742960620 |
| N  | -0.103095980 | -0.282455870  | -0.032252320 |
| C  | -2.115360480 | -0.278839230  | -5.704045810 |
| F  | -1.261188940 | 0.186121470   | -6.663827690 |
| F  | -2.466003420 | -1.549416960  | -6.083227740 |
| F  | -3.251057940 | 0.486307860   | -5.815806550 |
| C  | 2.157447800  | 0.337421870   | -5.531968260 |
| F  | 2.562149300  | 1.588180360   | -5.925210600 |
| F  | 3.278802220  | -0.459495320  | -5.582462700 |
| F  | 1.334069340  | -0.125988610  | -6.515999050 |

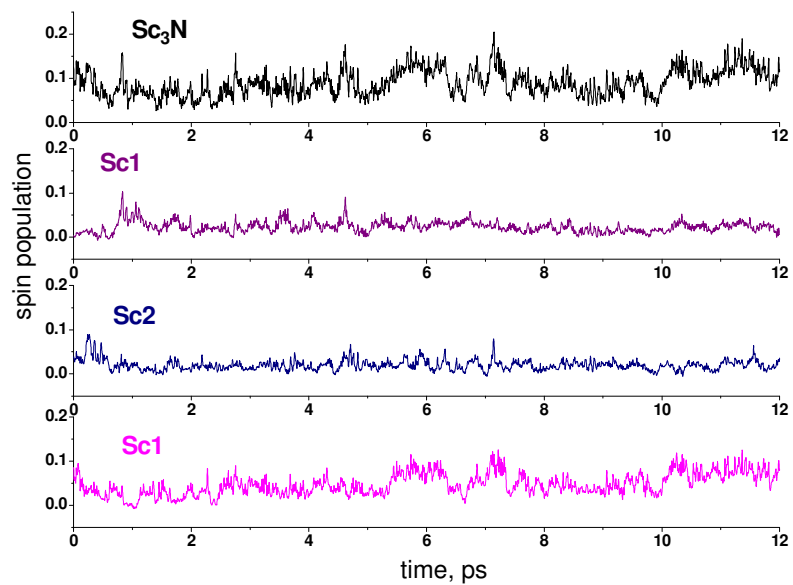

**Figure S1.** Spin populations in  $\text{Sc}_3\text{N}@C_{80}(\text{CF}_3)_2^+$  as a functions of time.

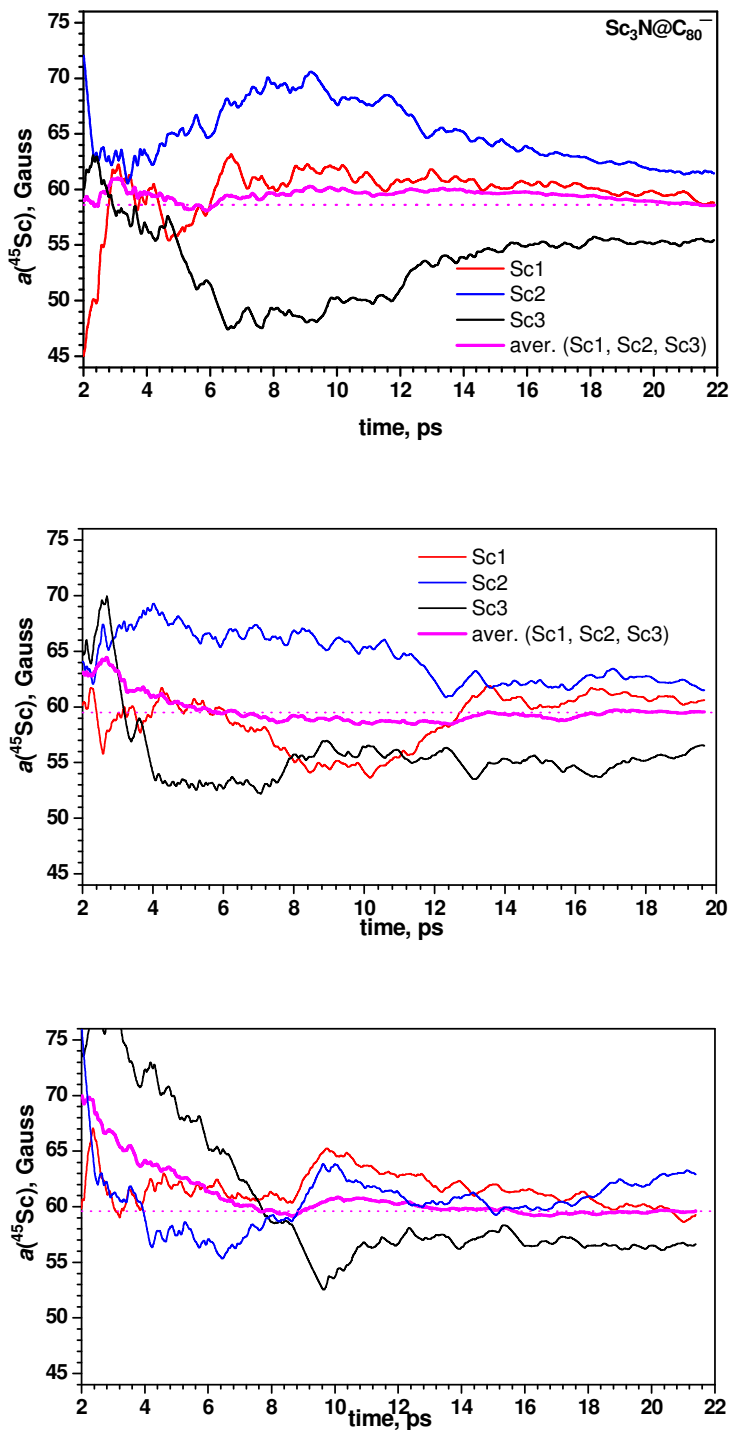

**Figure S2.** Time-averaged  $a(^{45}\text{Sc})$  values in  $\text{Sc}_3\text{N}@C_{80}^-$  as a function of propagation time in three independent trajectories (BOMD simulations, 300 K, PBE/DZ(P) level). Large oscillations of  $a(^{45}\text{Sc})$  values during the first two picoseconds are not shown. In all figures the mean value is shown in magenta, note that the mean values converge to the same value in all three runs.

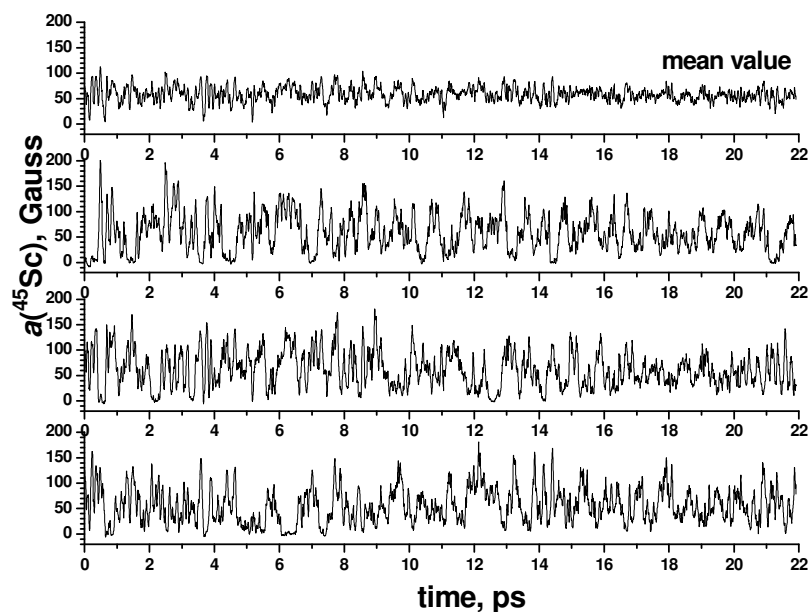

**Figure S3.** Instant  $a(^{45}\text{Sc})$  values in  $\text{Sc}_3\text{N@C}_{80}^-$  as a function of time in BOMD trajectory (300 K, PBE/DZ(P) level). Note that the values for individual atoms oscillate in the range of 0-200 Gauss, while the mean value for three Sc atoms oscillates in much smaller range.

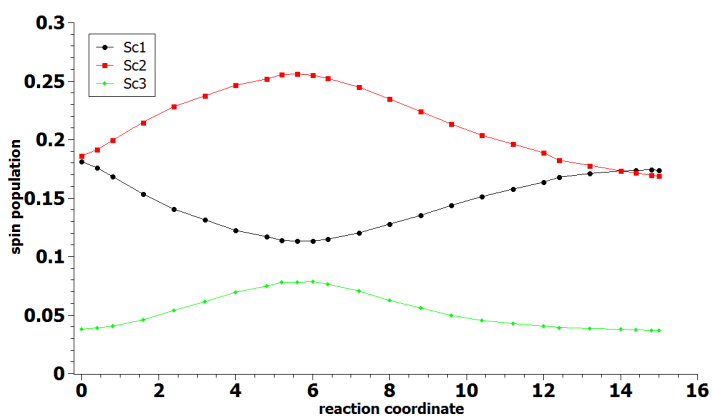

**Figure S4.** Mulliken spin population for Sc1-Sc3 atoms in  $\text{Sc}_3\text{N@C}_{80}(\text{CF}_3)_2^-$  along the reaction coordinate (PBE0/6-311G\* calculations with CP3P basis for Sc atoms)
